# Supplementary material
Source: bioRxiv or medRxiv preprint supplement (https://www.medrxiv.org/highwire/filestream/82349/field_highwire_adjunct_files/1/2020.05.21.20109512-2.pdf)
Supplement: Supplementary file [file 2020.05.21.20109512-2.pdf]

## 恢复期血浆治疗知情同意书

尊敬的患者:

我们将邀请您参加一项临床研究。本知情同意书提供给您一些信息以帮助您决定是否参加此项临床研究。请您仔细阅读, 如有任何疑问请向负责该项研究的研究者提出。

您参加本研究是自愿的。本次研究已通过遵义医学院附属医院生物医学伦理委员会审查。

如果您愿意, 请仔细阅读以下内容。

方案名称: COVID-19 临床特征及治疗效果分析

方案版本号与日期: KLL-2020-013

知情同意书版本号与日期: 第 1.0 版, 2020-03-05

研究中心: 遵义医学院附属医院重症医学科

主要研究者: 张伟, 金灿, 谷娟, 袁有树, 龙琴英, 张奇, 周厚荣, 邹卫东

### 一、研究目的

恢复期血浆是指在感染消退和抗体产生后从个体分离出来的血浆。输注恢复期血浆可降低近期感染病原菌患者的临床感染或临床严重程度。恢复期血浆治疗对病毒载量、血清细胞因子反应和死亡率有较好的影响。从历史上看, 恢复期血浆治疗在暴露后预防和感染后治疗的各种传染病中有许多成功的应用。本研究的目的是探究恢复期血浆治疗在新型冠状病毒中的疗效。

### 二、研究过程

如果您同意参与这项研究, 我们将对每位受试者进行编号, 建立病历档案。在对您进行恢复期血浆治疗的前后, 我们需要采集一些您的标本, 将由专业人员为您取样, 例如从您的胳膊上抽取静脉血 10 毫升, 共需 3 次。您的样本仅用于本次研究。

### 三、风险与不适

以抽取血标本为例: 对于您来说, 所有的信息将是保密的。您的样本采集将严格按照无菌要求操作, 标本的采集可能会有一些非常小的风险, 包括短暂的疼痛、局部青紫, 少数人会有轻度头晕, 或极为罕见的针头感染。

### 四、受益

通过对您的标本进行检测将有助于对疾病作出诊断, 为您的治疗提供必要的建议, 或为疾病的研究提供有益的信息。

### 五、责任

作为受试者, 您有以下职责: 提供有关自身病史和当前身体状况的真实情况; 告诉研究医生自己在本次研究期间所出现的任何不适; 不得服用受限制的药物、食物等; 告诉研究医生自己在最近是否曾参与其他研究, 或目前正参与其他研究。

#### 六、隐私问题

如果您决定参加本项研究，您参加试验及在试验中的个人资料均属保密。您的血/尿/病理标本将以研究编号数字而非您的姓名加以标识。可以识别您身份的信息将不会透露给研究小组以外的成员，除非获得您的许可。所有的研究人员和研究申办方都被要求对您的身份保密。您的档案将保存在有锁的档案柜中，仅供研究人员查阅。为确保研究按照规定进行，必要时，政府管理部门或伦理审查委员会的成员按规定可以在研究单位查阅您的个人资料。这项研究结果发表时，将不会披露您个人的任何资料。

除本研究以外，有可能在今后的其他研究中会再次利用您的医疗记录、血/尿/病理检查标本。您现在也可以声明拒绝除本研究外的其他研究利用您的医疗记录和病理标本。

#### 七、权利

如果您因参与这项研究而受到伤害：如发生与该项临床研究相关的损害时，您可以获得免费治疗和/或相应的补偿。

您可以选择不参加本项研究，或者在任何时候通知研究者要求退出研究，您的数据将不纳入研究结果，您的任何医疗待遇与权益不会因此而受到影响。

如果您需要其它治疗，或者您没有遵守研究计划，或者发生了与研究相关的损伤或者有任何其它原因，研究医师可以终止您继续参与本项研究。

您可随时了解与本研究有关的信息资料和研究进展，如果您有与本研究有关的问题，或您在研究过程中发生了任何不适与损伤，或有关于本项研究参加者权益方面的问题您可以随时与研究者联系。

### 知情同意书

我已经阅读了本知情同意书。

我有机会提问而且所有问题均已得到解答。

我理解参加本项研究是自愿的。

我可以选择不参加本项研究，或者在任何时候通知研究者后退出而不会遭到歧视或报复，我的任何医疗待遇与权益不会因此而受到影响。

如果我需要其它治疗，或者我没有遵守研究计划，或者发生了与研究相关的损伤或者有任何其它原因，研究医师可以终止我继续参与本项研究。

我将收到一份签过字的知情同意书副本。

最后，我决定同意参加本项研究。

受试者签名: 吴晓瑞 签名日期: 2020年3月2日

受试者联系电话: 15348638303

我已准确地将这份文件告知受试者，他/她准确地阅读了这份知情同意书，并证明该受试者有机会提出问题。我证明他/她是自愿同意的。

研究者签名: 金大川 签名日期: 2020年3月2日

研究者联系电话: 18786331675

## 恢复期血浆治疗知情同意书

尊敬的患者:

我们将邀请您参加一项临床研究。本知情同意书提供给您一些信息以帮助您决定是否参加此项临床研究。请您仔细阅读, 如有任何疑问请向负责该项研究的研究者提出。

您参加本项研究是自愿的。本次研究已通过遵义医学院附属医院生物医学伦理委员会审查。

如果您愿意, 请仔细阅读以下内容。

方案名称: COVID-19 临床特征及治疗效果分析

方案版本号与日期: KLL-2020-013

知情同意书版本号与日期: 第 1.0 版, 2020-03-05

研究中心: 遵义医学院附属医院重症医学科

主要研究者: 张伟, 金灿, 谷娟, 袁有树, 龙琴英, 张奇, 周厚荣, 郭卫东

### 一、研究目的

恢复期血浆是指在感染消退和抗体产生后从个体分离出来的血浆。输注恢复期血浆可降低近期感染病原菌患者的临床感染或临床严重程度。恢复期血浆治疗对病毒载量、血清细胞因子反应和死亡率有较好的影响。从历史上看, 恢复期血浆治疗在暴露后预防和感染后治疗的各种传染病中有许多成功的应用。本研究的目的是探究恢复期血浆治疗在新型冠状病毒中的疗效。

### 二、研究过程

如果您同意参与这项研究, 我们将对每位受试者进行编号, 建立病历档案。在对您进行恢复期血浆治疗的前后, 我们需要采集一些您的标本, 将由专业人员为您取样, 例如从您的胳膊上抽取静脉血 10 毫升, 共需 3 次。您的样本仅用于本次研究。

### 三、风险与不适

以抽取血标本为例: 对于您来说, 所有的信息将是保密的。您的样本采集将严格按照无菌要求操作, 标本的采集可能会有一些非常小的风险, 包括短暂的疼痛、局部青紫, 少数人会有轻度头晕, 或极为罕见的针头感染。

### 四、受益

通过对您的标本进行检测将有助于对疾病作出诊断, 为您的治疗提供必要的建议, 或为疾病的研究提供有益的信息。

### 五、责任

作为受试者, 您有以下职责: 提供有关自身病史和当前身体状况的真实情况; 告诉研究医生自己在本次研究期间所出现的任何不适; 不得服用受限制的药物、食物等; 告诉研究医生自己在最近是否曾参与其他研究, 或目前正参与其他研究。

#### 六、隐私问题

如果您决定参加本项研究, 您参加试验及在试验中的个人资料均属保密。您的血/尿/病理标本将以研究编号数字而非您的姓名加以标识。可以识别您身份的信息将不会透露给研究小组以外的成员, 除非获得您的许可。所有的研究人员和研究申办方都被要求对您的身份保密。您的档案将保存在有锁的档案柜中, 仅供研究人员查阅。为确保研究按照规定进行, 必要时, 政府管理部门或伦理审查委员会的成员按规定可以在研究单位查阅您的个人资料。这项研究结果发表时, 将不会披露您个人的任何资料。

除本研究以外, 有可能在今后的其他研究中会再次利用您的医疗记录、血/尿/病理检查标本。您现在也可以声明拒绝除本研究外的其他研究利用您的医疗记录和病理标本。

#### 七、权利

如果您因参与这项研究而受到伤害: 如发生与该项临床研究相关的损害时, 您可以获得免费治疗和/或相应的补偿。

您可以选择不参加本项研究, 或者在任何时候通知研究者要求退出研究, 您的数据将不纳入研究结果, 您的任何医疗待遇与权益不会因此而受到影响。

如果您需要其它治疗, 或者您没有遵守研究计划, 或者发生了与研究相关的损伤或者有任何其它原因, 研究医师可以终止您继续参与本项研究。

您可随时了解与本研究有关的信息资料和研究进展, 如果您有与本研究有关的问题, 或您在研究过程中发生了任何不适与损伤, 或有关于本项研究参加者权益方面的问题您可以随时与研究者的联系。

### 知情同意书

我已经阅读了本知情同意书。

我有机会提问而且所有问题均已得到解答。

我理解参加本项研究是自愿的。

我可以选择不参加本项研究，或者在任何时候通知研究者后退出而不会遭到歧视或报复，我的任何医疗待遇与权益不会因此而受到影响。

如果我需要其它治疗，或者我没有遵守研究计划，或者发生了与研究相关的损伤或者有任何其它原因，研究医师可以终止我继续参与本项研究。

我将收到一份签过字的知情同意书副本。

最后，我决定同意参加本项研究。

受试者签名: 李国成 签名日期: 2020年3月14日

受试者联系电话: 17767587078

我已准确地将这份文件告知受试者，他/她准确地阅读了这份知情同意书，并证明该受试者有机会提出问题。我证明他/她是自愿同意的。

研究者签名: 金地 签名日期: 2020年3月14日

研究者联系电话: 18786331675

## 恢复期血浆治疗知情同意书

尊敬的患者:

我们将邀请您参加一项临床研究。本知情同意书提供给您一些信息帮助您决定是否参加此项临床研究。请您仔细阅读, 如有任何疑问请向负责该项研究的研究者提出。

您参加本项研究是自愿的。本次研究已通过遵义医学院附属医院生物医学伦理委员会审查。

如果您愿意, 请仔细阅读以下内容。

方案名称: COVID-19 临床特征及治疗效果分析

方案版本号与日期: KLL-2020-013

知情同意书版本号与日期: 第 1.0 版, 2020-03-05

研究中心: 遵义医学院附属医院重症医学科

主要研究者: 张伟, 金灿, 谷娟, 袁有树, 龙琴英, 张奇, 周厚荣, 郭卫东

### 一、研究目的

恢复期血浆是指在感染消退和抗体产生后从个体分离出来的血浆。输注恢复期血浆可降低近期感染病原菌患者的临床感染或临床严重程度。恢复期血浆治疗对病毒载量、血清细胞因子反应和死亡率有较好的影响。从历史上看, 恢复期血浆治疗在暴露后预防和感染后治疗的各种传染病中有许多成功的应用。本研究的目的是探究恢复期血浆治疗在新型冠状病毒中的疗效。

### 二、研究过程

如果您同意参与这项研究, 我们将对每位受试者进行编号, 建立病历档案。在对您进行恢复期血浆治疗的前后, 我们需要采集一些您的标本, 将由专业人员为您取样, 例如从您的胳膊上抽取静脉血 10 毫升, 共需 3 次。您的样本仅用于本次研究。

### 三、风险与不适

以抽取血标本为例: 对于您来说, 所有的信息将是保密的。您的样本采集将严格按照无菌要求操作, 标本的采集可能会有一些非常小的风险, 包括短暂的疼痛、局部青紫, 少数人会有轻度头晕, 或极为罕见的针头感染。

### 四、受益

通过对您的标本进行检测将有助于对疾病作出诊断, 为您的治疗提供必要的建议, 或为疾病的研究提供有益的信息。

### 五、责任

作为受试者, 您有以下职责: 提供有关自身病史和当前身体状况的真实情况; 告诉研究医生自己在本次研究期间所出现的任何不适; 不得服用受限制的药物、食物等; 告诉研究医生自己在最近是否曾参与其他研究, 或目前正参与其他研究。

#### 六、隐私问题

如果您决定参加本研究, 您参加试验及在试验中的个人资料均属保密。您的血/尿/病理标本将以研究编号数字而非您的姓名加以标识。可以识别您身份的信息将不会透露给研究小组以外的成员, 除非获得您的许可。所有的研究人员和研究申办方都被要求对您的身份保密。您的档案将保存在有锁的档案柜中, 仅供研究人员查阅。为确保研究按照规定进行, 必要时, 政府管理部门或伦理审查委员会的成员按规定可以在研究单位查阅您的个人资料。这项研究结果发表时, 将不会披露您个人的任何资料。

除本研究以外, 有可能在今后的其他研究中会再次利用您的医疗记录、血/尿/病理检查标本。您现在也可以声明拒绝除本研究外的其他研究利用您的医疗记录和病理标本。

#### 七、权利

如果您因参与这项研究而受到伤害, 如发生与该项临床研究相关的损害时, 您可以获得免费治疗和/或相应的补偿。

您可以选择不参加本研究, 或者在任何时候通知研究者要求退出研究, 您的数据将不纳入研究结果, 您的任何医疗待遇与权益不会因此而受到影响。

如果您需要其它治疗, 或者您没有遵守研究计划, 或者发生了与研究相关的损伤或者有任何其它原因, 研究医师可以终止您继续参与本研究。

您可随时了解与本研究有关的信息资料和研究进展, 如果您有与研究有关的问题, 或您在研究过程中发生了任何不适与损伤, 或有关于本研究参加者权益方面的问题您可以随时与研究者优先联系。



### 知情同意书

我已经阅读了本知情同意书。

我有机会提问而且所有问题均已得到解答。

我理解参加本项研究是自愿的。

我可以选择不参加本项研究，或者在任何时候通知研究者后退出而不会遭到歧视或报复，我的任何医疗待遇与权益不会因此而受到影响。

如果我需要其它治疗，或者我没有遵守研究计划，或者发生了与研究相关的损伤或者有任何其它原因，研究医师可以终止我继续参与本项研究。

我将收到一份签过字的知情同意书副本。

最后，我决定同意参加本项研究。

受试者签名: 齐兴 签名日期: 2020 年 4 月 5 日

受试者联系电话: 15927176221

我已准确地将这份文件告知受试者，他/她准确地阅读了这份知情同意书，并证明该受试者有机会提出问题。我证明他/她是自愿同意的。

研究者签名: 金仙 签名日期: 2020 年 4 月 5 日

研究者联系电话: 18786331675

## 恢复期血浆治疗知情同意书

尊敬的患者:

我们将邀请您参加一项临床研究。本知情同意书提供给您一些信息以帮助您决定是否参加此项临床研究。请您仔细阅读, 如有任何疑问请向负责该项研究的研究者提出。

您参加本项研究是自愿的。本次研究已通过遵义医学院附属医院生物医学伦理委员会审查。

如果您愿意, 请仔细阅读以下内容。

方案名称: COVID-19 临床特征及治疗效果分析

方案版本号与日期: KLL-2020-013

知情同意书版本号与日期: 第 1.0 版, 2020-03-05

研究中心: 遵义医学院附属医院重症医学科

主要研究者: 张伟, 金灿, 谷娟, 袁有树, 龙琴英, 张奇, 周厚荣, 邬卫东

### 一、研究目的

恢复期血浆是指在感染消退和抗体产生后从个体分离出来的血浆。输注恢复期血浆可降低近期感染病原菌患者的临床感染或临床严重程度。恢复期血浆治疗对病毒载量、血清细胞因子反应和死亡率有较好的影响。从历史上看, 恢复期血浆治疗在暴露后预防和感染后治疗的各种传染病中有许多成功的应用。本研究的目的是探究恢复期血浆治疗在新型冠状病毒病中的疗效。

### 二、研究过程

如果您同意参与这项研究, 我们将对每位受试者进行编号, 建立病历档案。在对您进行恢复期血浆治疗的前后, 我们需要采集一些您的标本, 将由专业人员为您取样, 例如从您的胳膊上抽取静脉血 10 毫升, 共需 3 次。您的样本仅用于本次研究。

### 三、风险与不适

以抽取血标本为例: 对于您来说, 所有的信息将是保密的。您的样本采集将严格按照无菌要求操作, 标本的采集可能会有一些非常小的风险, 包括短暂的疼痛、局部青紫, 少数人会有轻度头晕, 或极为罕见的针头感染。

### 四、受益

通过对您的标本进行检测将有助于对疾病作出诊断, 为您的治疗提供必要的建议, 或为疾病的研究提供有益的信息。

### 五、责任

作为受试者, 您有以下职责: 提供有关自身病史和当前身体状况的真实情况; 告诉研究医生自己在本次研究期间所出现的任何不适; 不得服用受限制的药物、食物等; 告诉研究医生自己在最近是否曾参与其他研究, 或目前正参与其他研究。

#### 六、隐私问题

如果您决定参加本研究, 您参加试验及在试验中的个人资料均属保密。您的血/尿/病理标本将以研究编号数字而非您的姓名加以标识。可以识别您身份的信息将不会透露给研究小组以外的成员, 除非获得您的许可。所有的研究人员和研究申办方都被要求对您的身份保密。您的档案将保存在有锁的档案柜中, 仅供研究人员查阅。为确保研究按照规定进行, 必要时, 政府管理部门或伦理审查委员会的成员按规定可以在研究单位查阅您的个人资料。这项研究结果发表时, 将不会披露您个人的任何资料。

除本研究以外, 有可能在今后的其他研究中会再次利用您的医疗记录、血/尿/病理检查标本。您现在也可以声明拒绝除本研究外的其他研究利用您的医疗记录和病理标本。

#### 七、权利

如果您因参与这项研究而受到伤害; 如发生与该项临床研究相关的损害时, 您可以获得免费治疗和/或相应的补偿。

您可以选择不参加本研究, 或者在任何时候通知研究者要求退出研究, 您的数据将不纳入研究结果, 您的任何医疗待遇与权益不会因此而受到影响。

如果您需要其它治疗, 或者您没有遵守研究计划, 或者发生了与研究相关的损伤或者有任何其它原因, 研究医师可以终止您继续参与本研究。

您可随时了解与本研究有关的信息资料和研究进展, 如果您有与本研究有关的问题, 或您在研究过程中发生了任何不适与损伤, 或有关于本研究参加者权益方面的问题您可以随时与研究者的联系。

### 知情同意书

我已经阅读了本知情同意书。

我有机会提问而且所有问题均已得到解答。

我理解参加本项研究是自愿的。

我可以选择不参加本项研究，或者在任何时候通知研究者后退出而不会遭到歧视或报复，我的任何医疗待遇与权益不会因此而受到影响。

如果我需要其它治疗，或者我没有遵守研究计划，或者发生了与研究相关的损伤或者有任何其它原因，研究医师可以终止我继续参与本项研究。

我将收到一份签过字的知情同意书副本。

最后，我决定同意参加本项研究。

受试者签名: 朱克红 签名日期: 2020年4月5日

受试者联系电话: 15926372486

我已准确地将这份文件告知受试者，他/她准确地阅读了这份知情同意书，并证明该受试者有机会提出问题。我证明他/她是自愿同意的。

研究者签名: 金松 签名日期: 2020年4月5日

研究者联系电话: 18786331675

## 恢复期血浆治疗知情同意书

尊敬的患者:

我们将邀请您参加一项临床研究。本知情同意书提供给您一些信息以帮助您决定是否参加此项临床研究。请您仔细阅读, 如有任何疑问请向负责该项研究的研究者提出。

您参加本项研究是自愿的。本次研究已通过遵义医学院附属医院生物医学伦理委员会审查。

如果您愿意, 请仔细阅读以下内容。

方案名称: COVID-19 临床特征及治疗效果分析

方案版本号与日期: KLL-2020-013

知情同意书版本号与日期: 第 1.0 版, 2020-03-05

研究中心: 遵义医学院附属医院重症医学科

主要研究者: 张伟, 金灿, 谷娟, 袁有树, 龙琴英, 张奇, 周厚荣, 郭卫东

### 一、研究目的

恢复期血浆是指在感染消退和抗体产生后从个体分离出来的血浆。输注恢复期血浆可降低近期感染病原菌患者的临床感染或临床严重程度。恢复期血浆治疗对病毒载量、血清细胞因子反应和死亡率有较好的影响。从历史上看, 恢复期血浆治疗在暴露后预防和感染后治疗的各种传染病中有许多成功的应用。本研究的目的是探究恢复期血浆治疗在新型冠状病毒中的疗效。

### 二、研究过程

如果您同意参与这项研究, 我们将对每位受试者进行编号, 建立病历档案。在对您进行恢复期血浆治疗的前后, 我们需要采集一些您的标本, 将由专业人员为您取样, 例如从您的胳膊上抽取静脉血 10 毫升, 共需 3 次。您的样本仅用于本次研究。

### 三、风险与不适

以抽取血标本为例: 对于您来说, 所有的信息将是保密的。您的样本采集将严格按照无菌要求操作, 标本的采集可能会有一些非常小的风险, 包括短暂的疼痛、局部青紫, 少数人会有轻度头晕, 或极为罕见的针头感染。

### 四、受益

通过对您的标本进行检测将有助于对疾病作出诊断, 为您的治疗提供必要的建议, 或为疾病的研究提供有益的信息。

### 五、责任

作为受试者, 您有以下职责: 提供有关自身病史和当前身体状况的真实情况; 告诉研究医生自己在本次研究期间所出现的任何不适; 不得服用受限制的、药物、食物等; 告诉研究医生自己在最近是否曾参与其他研究, 或目前正参与其他研究。

#### 六、隐私问题

如果您决定参加本研究, 您参加试验及在试验中的个人资料均属保密。您的血/尿/病理标本将以研究编号数字而非您的姓名加以标识。可以识别您身份的信息将不会透露给研究小组以外的成员, 除非获得您的许可。所有的研究成员和研究申办方都被要求对您的身份保密。您的档案将保存在有锁的档案柜中, 仅供研究人员查阅。为确保研究按照规定进行, 必要时, 政府管理部门或伦理审查委员会的成员按规定可以在研究单位查阅您的个人资料。这项研究结果发表时, 将不会披露您个人的任何资料。

除本研究以外, 有可能在今后的其他研究中会再次利用您的医疗记录、血/尿/病理检查标本。您现在也可以声明拒绝除本研究外的其他研究利用您的医疗记录和病理标本。

#### 七、权利

如果您因参与这项研究而受到伤害: 如发生与该项临床研究相关的损害时, 您可以获得免费治疗和/或相应的补偿。

您可以选择不参加本研究, 或者在任何时候通知研究者要求退出研究, 您的数据将不纳入研究结果, 您的任何医疗待遇与权益不会因此而受到影响。

如果您需要其它治疗, 或者您没有遵守研究计划, 或者发生了与研究相关的损伤或者有任何其它原因, 研究医师可以终止您继续参与本研究。

您可随时了解与本研究有关的信息资料和研究进展, 如果您有与研究有关的问题, 或您在研究过程中发生了任何不适与损伤, 或有关于本研究参加者权益方面的问题您可以随时与研究者的联系。

### 知情同意书

我已经阅读了本知情同意书。

我有机会提问而且所有问题均已得到解答。

我理解参加本项研究是自愿的。

我可以选择不参加本项研究，或者在任何时候通知研究者后退出而不会遭到歧视或报复，我的任何医疗待遇与权益不会因此而受到影响。

如果我需要其它治疗，或者我没有遵守研究计划，或者发生了与研究相关的损伤或者有任何其它原因，研究医师可以终止我继续参与本项研究。

我将收到一份签过字的知情同意书副本。

最后，我决定同意参加本项研究。

受试者签名: 张廷芬 签名日期: 2020 年 3 月 5 日

受试者联系电话: 15186673571

我已准确地将这份文件告知受试者，他/她准确地阅读了这份知情同意书，并证明该受试者有机会提出问题。我证明他/她是自愿同意的。

研究者签名: 金松 签名日期: 2020 年 3 月 5 日

研究者联系电话: 18786331675

## 恢复期血浆治疗知情同意书

尊敬的患者:

我们将邀请您参加一项临床研究。本知情同意书提供给您一些信息帮助您决定是否参加此项临床研究。请您仔细阅读, 如有任何疑问请向负责该项研究的研究者提出。

您参加本项研究是自愿的。本次研究已通过遵义医学院附属医院生物医学伦理委员会审查。

如果您愿意, 请仔细阅读以下内容。

方案名称: COVID-19 临床特征及治疗效果分析

方案版本号与日期: KLL-2020-013

知情同意书版本号与日期: 第 1.0 版, 2020-03-05

研究中心: 遵义医学院附属医院重症医学科

主要研究者: 张伟, 金灿, 谷娟, 袁有树, 龙琴英, 张奇, 周厚荣, 郭卫东

### 一、研究目的

恢复期血浆是指在感染消退和抗体产生后从个体分离出来的血浆。输注恢复期血浆可降低近期感染病原菌患者的临床感染或临床严重程度。恢复期血浆治疗对病毒载量、血清细胞因子反应和死亡率有较好的影响。从历史上看, 恢复期血浆治疗在暴露后预防和感染后治疗的各种传染病中有许多成功的应用。本研究的目的是探究恢复期血浆治疗在新型冠状病毒中的疗效。

### 二、研究过程

如果您同意参与这项研究, 我们将对每位受试者进行编号, 建立病历档案。在对您进行恢复期血浆治疗的前后, 我们需要采集一些您的标本, 将由专业人员为您取样, 例如从您的胳膊上抽取静脉血 10 毫升, 共需 3 次。您的样本仅用于本次研究。

### 三、风险与不适

以抽取血标本为例: 对于您来说, 所有的信息将是保密的。您的样本采集将严格按照无菌要求操作, 标本的采集可能会有一些非常小的风险, 包括短暂的疼痛、局部青紫, 少数人会有轻度头晕, 或极为罕见的针头感染。

### 四、受益

通过对您的标本进行检测将有助于对疾病作出诊断, 为您的治疗提供必要的建议, 或为疾病的研究提供有益的信息。

### 五、责任

作为受试者, 您有以下职责: 提供有关自身病史和当前身体状况的真实情况; 告诉研究医生自己在本次研究期间所出现的任何不适; 不得服用受限制的药物、食物等; 告诉研究医生自己在最近是否曾参与其他研究, 或目前正参与其他研究。



#### 六、隐私问题

如果您决定参加本项研究, 您参加试验及在试验中的个人资料均属保密。您的血/尿/病理标本将以研究编号数字而非您的姓名加以标识。可以识别您身份的信息将不会透露给研究小组以外的成员, 除非获得您的许可。所有的研究成员和研究申办方都被要求对您的身份保密。您的档案将保存在有锁的档案柜中, 仅供研究人员查阅。为确保研究按照规定进行, 必要时, 政府管理部门或伦理审查委员会的成员按规定可以在研究单位查阅您的个人资料。这项研究结果发表时, 将不会披露您个人的任何资料。

除本研究以外, 有可能在今后的其他研究中会再次利用您的医疗记录、血/尿/病理检查标本。您现在也可以声明拒绝除本研究外的其他研究利用您的医疗记录和病理标本。

#### 七、权利

如果您因参与这项研究而受到伤害: 如发生与该项临床研究相关的损害时, 您可以获得免费治疗和/或相应的补偿。

您可以选择不参加本项研究, 或者在任何时候通知研究者要求退出研究, 您的数据将不纳入研究结果, 您的任何医疗待遇与权益不会因此而受到影响。

如果您需要其它治疗, 或者您没有遵守研究计划, 或者发生了与研究相关的损伤或者有任何其它原因, 研究医师可以终止您继续参与本项研究。

您可随时了解与本研究有关的信息资料和研究进展, 如果您有与本研究有关的问题, 或您在研究过程中发生了任何不适与损伤, 或有关于本项研究参加者权益方面的问题您可以随时与研究者的联系。

### 知情同意书

我已经阅读了本知情同意书。

我有机会提问而且所有问题均已得到解答。

我理解参加本项研究是自愿的。

我可以选择不参加本项研究，或者在任何时候通知研究者后退出而不会遭到歧视或报复，我的任何医疗待遇与权益不会因此而受到影响。

如果我需要其它治疗，或者我没有遵守研究计划，或者发生了与研究相关的损伤或者有任何其它原因，研究医师可以终止我继续参与本项研究。

我将收到一份签过字的知情同意书副本。

最后，我决定同意参加本项研究。

受试者签名: 甄昌禄 签名日期: 2020年3月13日

受试者联系电话: 13765712307

我已准确地将这份文件告知受试者，他/她准确地阅读了这份知情同意书，并证明该受试者有机会提出问题。我证明他/她是自愿同意的。

研究者签名: 金灿 签名日期: 2020年3月13日

研究者联系电话: 18786331675
